# Supplementary material for: Four novel metal coordination polymers directed by 1,1′-dibutyl-4,4′-bipyridinium dibromide (BBP) and their framework dependent luminescent properties
Source: Royal Society of Chemistry journal article supplement (doi:10.1039/c0ce00854k), 2011-01-01
Supplement: c0ce00854k.pdf [file c0ce00854k.pdf]

## Supporting Information for

### Four Novel Metal Coordination Polymers Directed By 1, 1'-dibutyl-4, 4'-bipyridinium dibromide (BBP) and Their Framework Dependent Luminescent Properties

Jun-Ming Yue,<sup>a</sup> Yun-Yin Niu,<sup>a\*</sup> Bing Zhang,<sup>b</sup> Seik-Weng Ng,<sup>c</sup> Hong-Wei

Hou<sup>a</sup>

**Table S1.** Selected bond distances(Å) and angles(°)for compound 1-4

| Compound 1         |             |                    |             |                    |             |
|--------------------|-------------|--------------------|-------------|--------------------|-------------|
| Ag(1)-I(1)         | 2.9093(4)   | Ag(1) #1-I(1)      | 2.9263(4)   | Ag(1)-I(2)         | 2.8111(4)   |
| Ag(1)-I(3)         | 2.7837(4)   |                    |             |                    |             |
| I(1)-Ag(1)-I(1) #1 | 82.401(11)  | I(3)-Ag(1)-I(2)    | 114.307(13) | I(3)-Ag(1)-I(1)    | 111.798(12) |
| I(2)-Ag(1)-I(1)    | 113.125(12) | I(3)-Ag(1)-I(1) #1 | 111.274(13) | I(2)-Ag(1)-I(1) #1 | 107.408(12) |
| I(1)-Ag(1)-I(1) #1 | 97.599(11)  |                    |             |                    |             |
| Compound 2         |             |                    |             |                    |             |
| Pb(1)-I(3)         | 3.0463(13)  | Pb(1)-I(2)         | 3.0639(12)  | Pb(1)-I(1)         | 3.1714(12)  |
| Pb(1)-I(6)         | 3.3524(12)  | Pb(1)-I(5)         | 3.3525(14)  | Pb(1)-I(4)         | 3.4043(12)  |
| Pb(2)-I(8)         | 3.0016(14)  | Pb(2)-I(6)         | 3.1017(12)  | Pb(2)-I(7)         | 3.1456(12)  |
| Pb(2)-I(10)#1      | 3.3140(12)  | Pb(2)-I(9)         | 3.3292(12)  | Pb(2)-I(5)         | 3.3726(13)  |
| Pb(3)-I(11)        | 3.0903(12)  | Pb(3)-I(5)         | 3.1491(13)  | Pb(3)-I(4)         | 3.1635(11)  |
| Pb(3)-I(9)#1       | 3.2115(12)  | Pb(3)-I(10)        | 3.2733(13)  | Pb(3)-I(9)         | 3.3054(12)  |
| I(9)-Pb(3)#1       | 3.2113(12)  | I(10)-Pb(2)#1      | 3.3141(12)  | I(3)-Pb(1)-I(2)    | 94.80(4)    |
| I(3)-Pb(1)-I(1)    | 90.27(4)    | I(2)-Pb(1)-I(1)    | 101.28(4)   | I(3)-Pb(1)-I(6)    | 87.35(3)    |
| I(2)-Pb(1)-I(6)    | 90.42(3)    | I(1)-Pb(1)-I(6)    | 168.22(3)   | I(3)-Pb(1)-I(5)    | 96.81(4)    |

<sup>a</sup>Department of Chemistry, Zhengzhou University, Zhengzhou 450052, P. R. China

<sup>b</sup>School of Chemical Engineerin and Energyg, Zhengzhou University, Zhengzhou 450001, P. R. china.

<sup>c</sup>Department of Chemistry, University of Malaya, 50603, Kuala Lumpur, Malaysia

|                    |             |                    |            |                     |             |
|--------------------|-------------|--------------------|------------|---------------------|-------------|
| I(2)-Pb(1)-I(5)    | 165.37(4)   | I(1)-Pb(1)-I(5)    | 87.55(3)   | I(6)-Pb(1)-I(5)     | 81.28(3)    |
| I(3)-Pb(1)-I(4)    | 176.53(4)   | I(2)-Pb(1)-I(4)    | 85.76(3)   | I(1)-Pb(1)-I(4)     | 92.98(3)    |
| I(6)-Pb(1)-I(4)    | 89.22(3)    | I(5)-Pb(1)-I(4)    | 82.13(3)   | I(8)-Pb(2)-I(6)     | 96.09(4)    |
| I(8)-Pb(2)-I(7)    | 95.51(4)    | I(6)-Pb(2)-I(7)    | 96.31(3)   | I(8)-Pb(2)-I(10)#1  | 92.22(4)    |
| I(6)-Pb(2)-I(10)#1 | 167.06(3)   | I(7)-Pb(2)-I(10)#1 | 92.74(3)   | I(8)-Pb(2)-I(9)     | 91.26(3)    |
| I(6)-Pb(2)-I(9)    | 86.14(3)    | I(7)-Pb(2)-I(9)    | 172.51(3)  | I(10)#1-Pb(2)-I(9)  | 83.78(3)    |
| I(8)-Pb(2)-I(5)    | 168.23(4)   | I(6)-Pb(2)-I(5)    | 84.72(3)   | I(7)-Pb(2)-I(5)     | 96.08(3)    |
| I(10)#1-Pb(2)-I(5) | 85.13(3)    | I(9)-Pb(2)-I(5)    | 77.06(3)   | I(11)-Pb(3)-I(5)    | 90.95(3)    |
| I(11)-Pb(3)-I(4)   | 99.86(3)    | I(5)-Pb(3)-I(4)    | 89.36(3)   | I(11)-Pb(3)-I(9)#1  | 87.40(3)    |
| I(5)-Pb(3)-I(9)#1  | 95.67(3)    | I(4)-Pb(3)-I(9)#1  | 171.12(3)  | I(11)-Pb(3)-I(10)   | 98.56(4)    |
| I(5)-Pb(3)-I(10)   | 170.37(4)   | I(4)-Pb(3)-I(10)   | 87.54(3)   | I(9)#1-Pb(3)-I(10)  | 86.31(3)    |
| I(11)-Pb(3)-I(9)   | 168.44(3)   | I(5)-Pb(3)-I(9)    | 80.56(3)   | I(4)-Pb(3)-I(9)     | 87.96(3)    |
| I(9)#1-Pb(3)-I(9)  | 85.67(3)    | I(10)-Pb(3)-I(9)   | 90.21(3)   |                     |             |
| <b>Compound 3</b>  |             |                    |            |                     |             |
| Cu(1)-N(2)         | 1.990(2)    | Cu(1)-N(1)         | 1.997(2)   | Cu(1)-S(2)#1        | 2.3786(8)   |
| Cu(1)-S(1)#2       | 2.4206(9)   |                    |            |                     |             |
| N(2)-Cu(1)-N(1)    | 115.09(10)  | N(2)-Cu(1)-S(2)#1  | 117.85(7)  | N(1)-Cu(1)-S(2)#1   | 102.37(7)   |
| N(2)-Cu(1)-S(1)#2  | 101.01(6)   | N(1)-Cu(1)-S(1)#2  | 112.14(8)  | S(2)#1-Cu(1)-S(1)#2 | 108.57(3)   |
| <b>Compound 4</b>  |             |                    |            |                     |             |
| Cu(1)-N(3)         | 1.9337(16)  | Cu(1)-N(2)         | 1.9738(15) | Cu(1)-S(1)          | 2.4068(5)   |
| Cu(1)-S(3)         | 2.4803(5)   | Cu(1)-Cu(2)        | 2.9565(3)  | Cu(2)-N(4)          | 2.0041(15)  |
| Cu(2)-S(2)         | 2.3251(5)   | Cu(2)-S(3)         | 2.3735(5)  | Cu(2)-S(1)          | 2.4543(5)   |
| N(3)-Cu(1)-N(2)    | 124.40(7)   | N(3)-Cu(1)-S(1)    | 114.32(5)  | N(2)-Cu(1)-S(1)     | 102.39(5)   |
| N(3)-Cu(1)-S(3)    | 106.53(5)   | N(2)-Cu(1)-S(3)    | 102.93(5)  | S(1)-Cu(1)-S(3)     | 104.125(17) |
| N(3)-Cu(1)-Cu(2)   | 124.35(5)   | N(2)-Cu(1)-Cu(2)   | 110.90(5)  | S(1)-Cu(1)-Cu(2)    | 53.275(13)  |
| S(3)-Cu(1)-Cu(2)   | 50.850(12)  | N(4)-Cu(2)-S(2)    | 112.38(5)  | N(4)-Cu(2)-S(3)     | 103.95(5)   |
| S(2)-Cu(2)-S(3)    | 122.050(18) | N(4)-Cu(2)-S(1)    | 104.60(5)  | S(2)-Cu(2)-S(1)     | 106.524(17) |
| S(3)-Cu(2)-S(1)    | 105.950(17) | N(4)-Cu(2)-Cu(1)   | 114.19(4)  | S(2)-Cu(2)-Cu(1)    | 132.320(15) |
| S(3)-Cu(2)-Cu(1)   | 54.135(13)  | S(1)-Cu(2)-Cu(1)   | 51.815(12) | C(10)-S(1)-Cu(1)    | 97.07(6)    |
| C(10)-S(1)-Cu(2)   | 94.69(6)    | Cu(1)-S(1)-Cu(2)   | 74.911(15) | C(11)-S(2)-Cu(2)    | 93.23(6)    |
| C(12)-S(3)-Cu(2)   | 95.39(6)    | C(12)-S(3)-Cu(1)   | 95.48(6)   | Cu(2)-S(3)-Cu(1)    | 75.015(15)  |

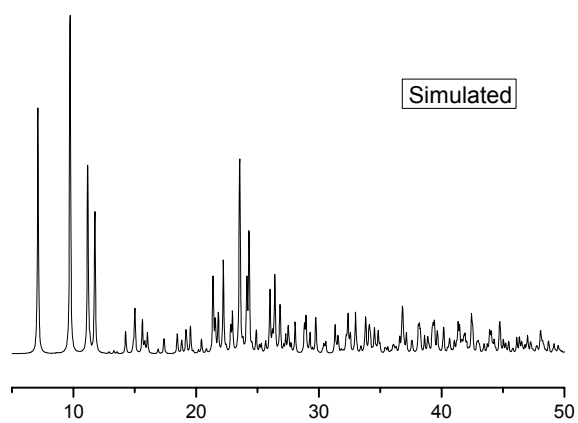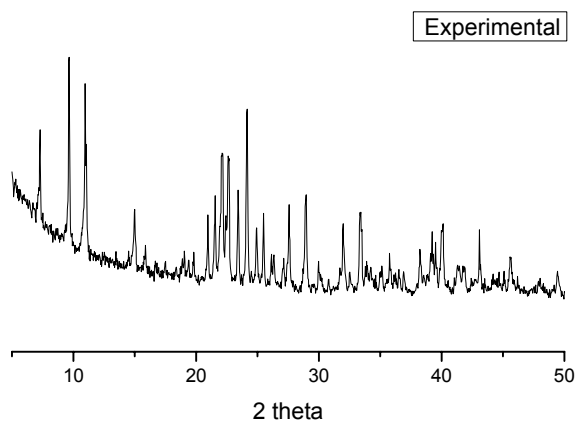

**Fig. S1** Simulated and experimental PXRD pattern of compound **1**.

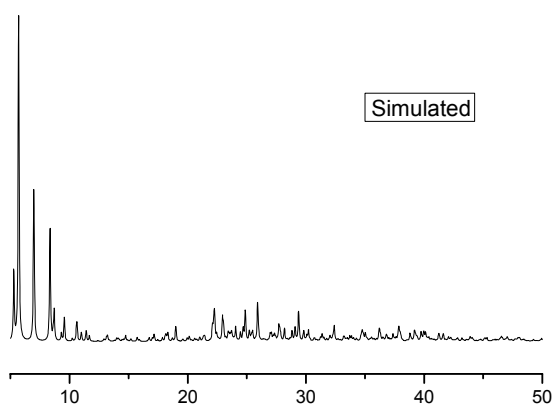

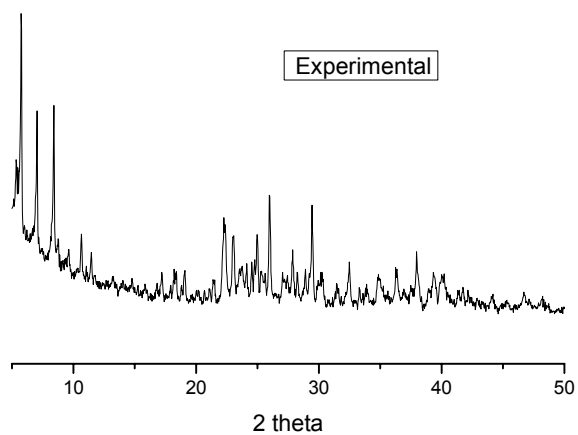

**Fig. S2** Simulated and experimental PXRD pattern of compound **2**.

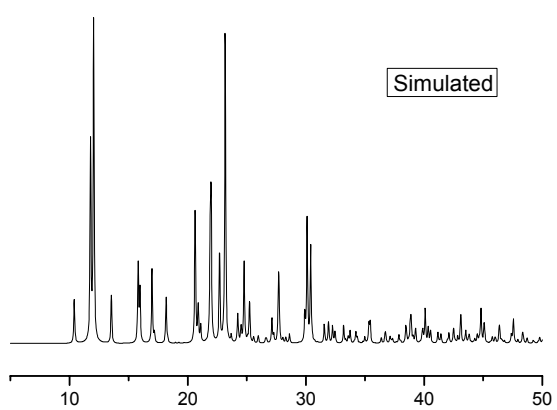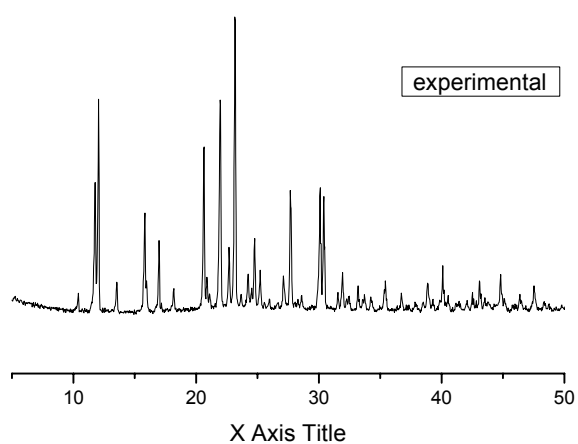

**Fig. S3** Simulated and experimental PXRD pattern of compound **3**

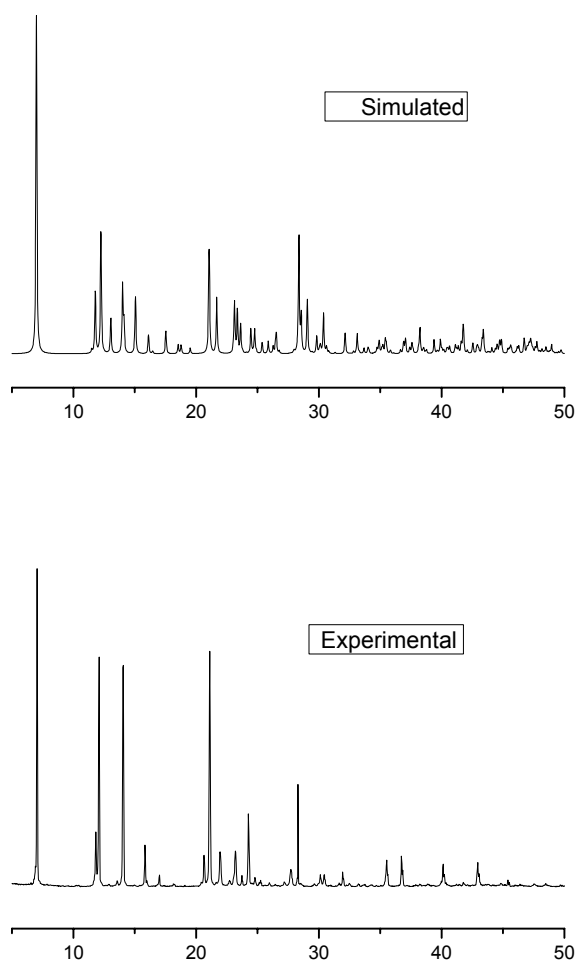

**Fig. S4** Simulated and experimental PXRD pattern of compound 4.

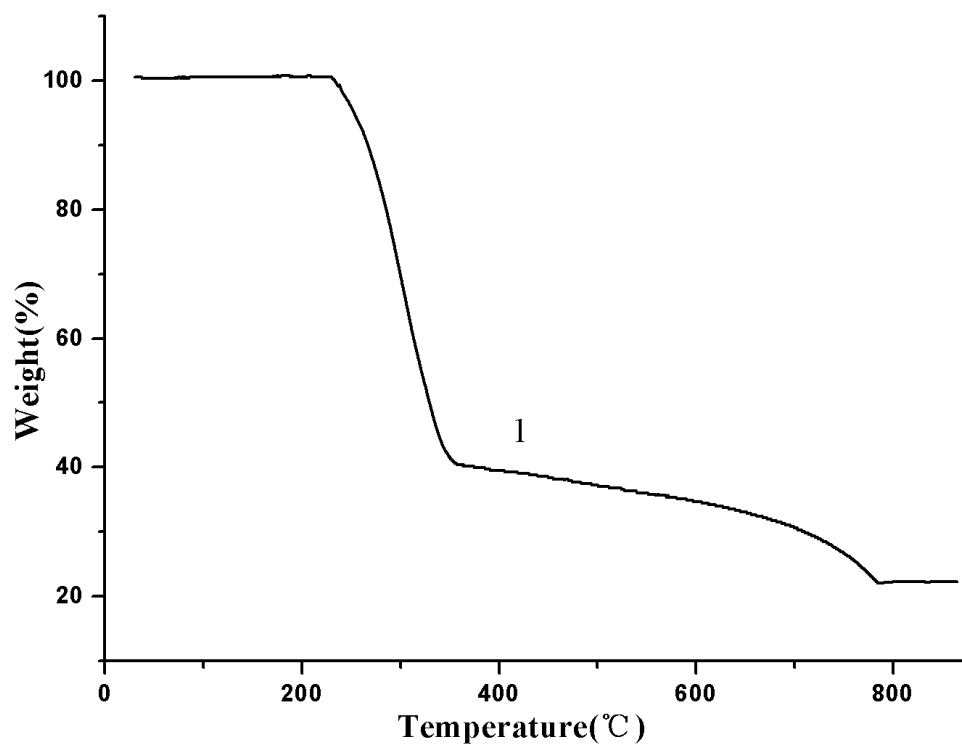

Fig. S5 TGA curves of 1

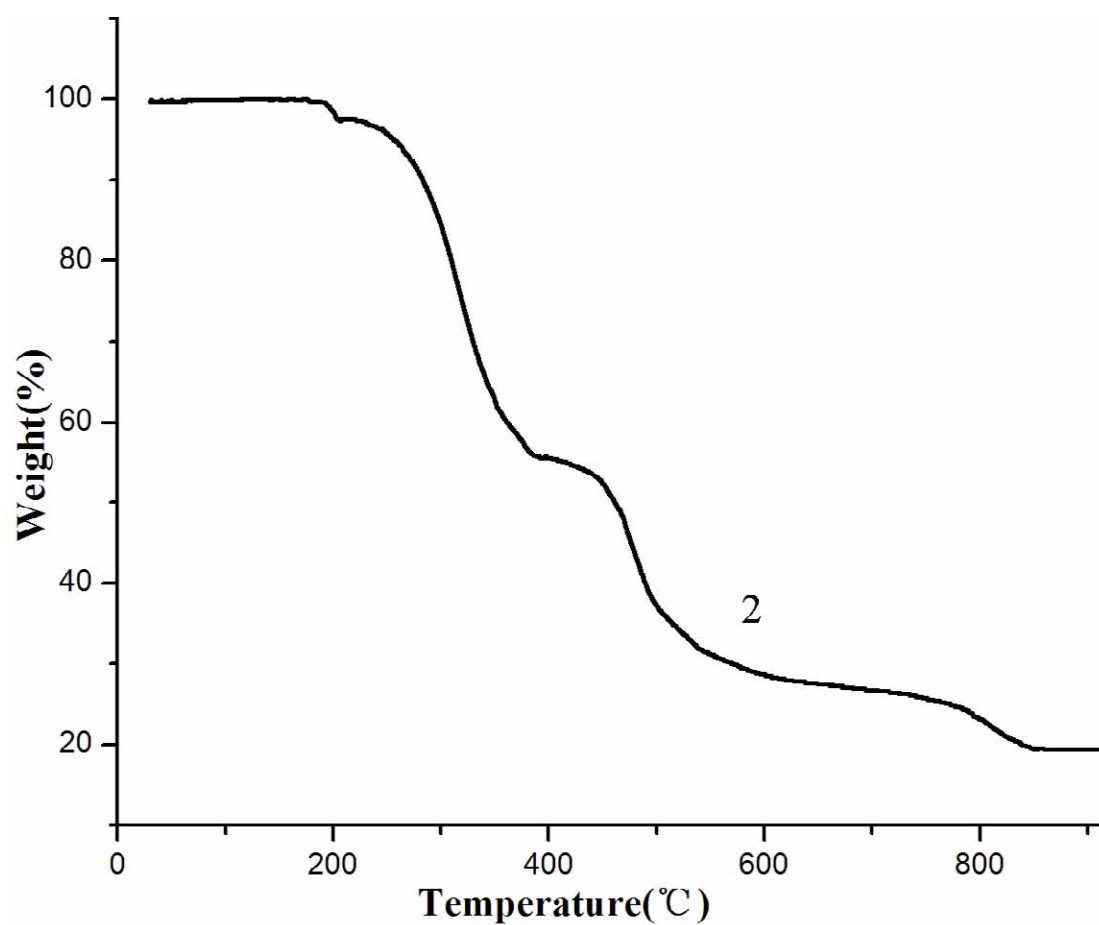

Fig. S6 TGA curves of 2

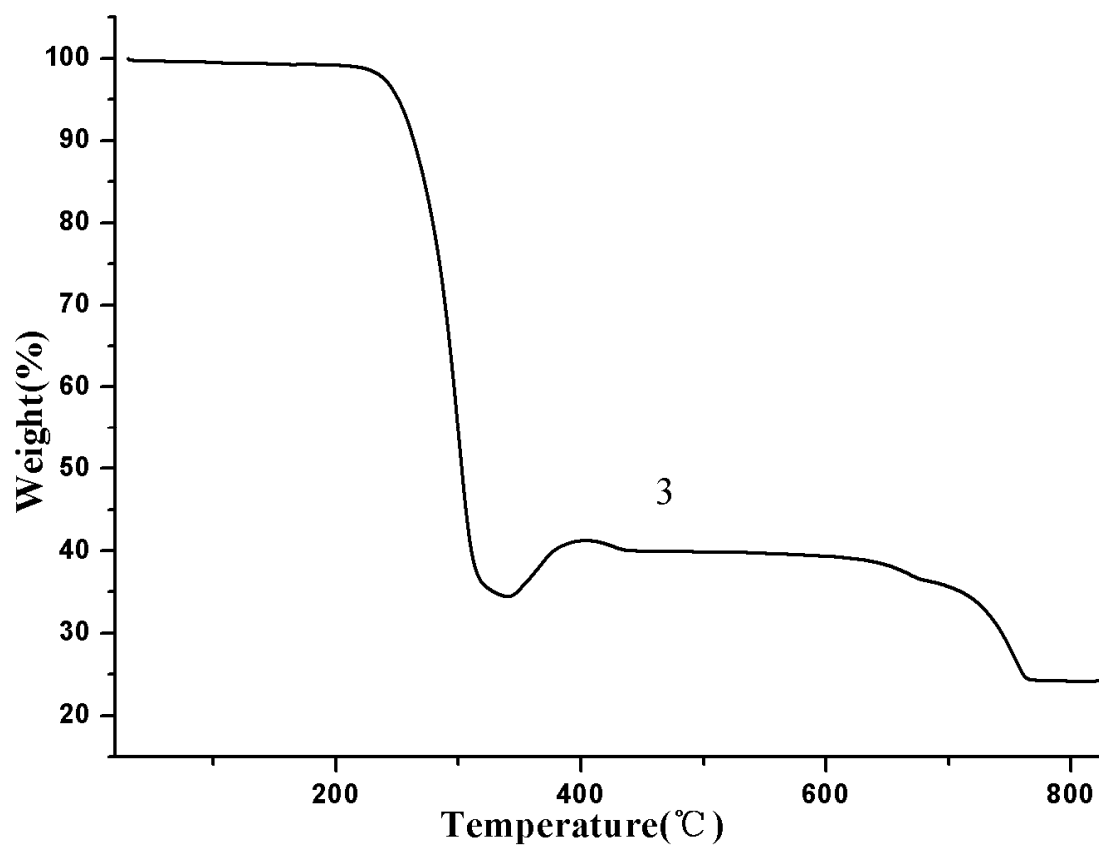

Fig. S7 TGA curves of 3

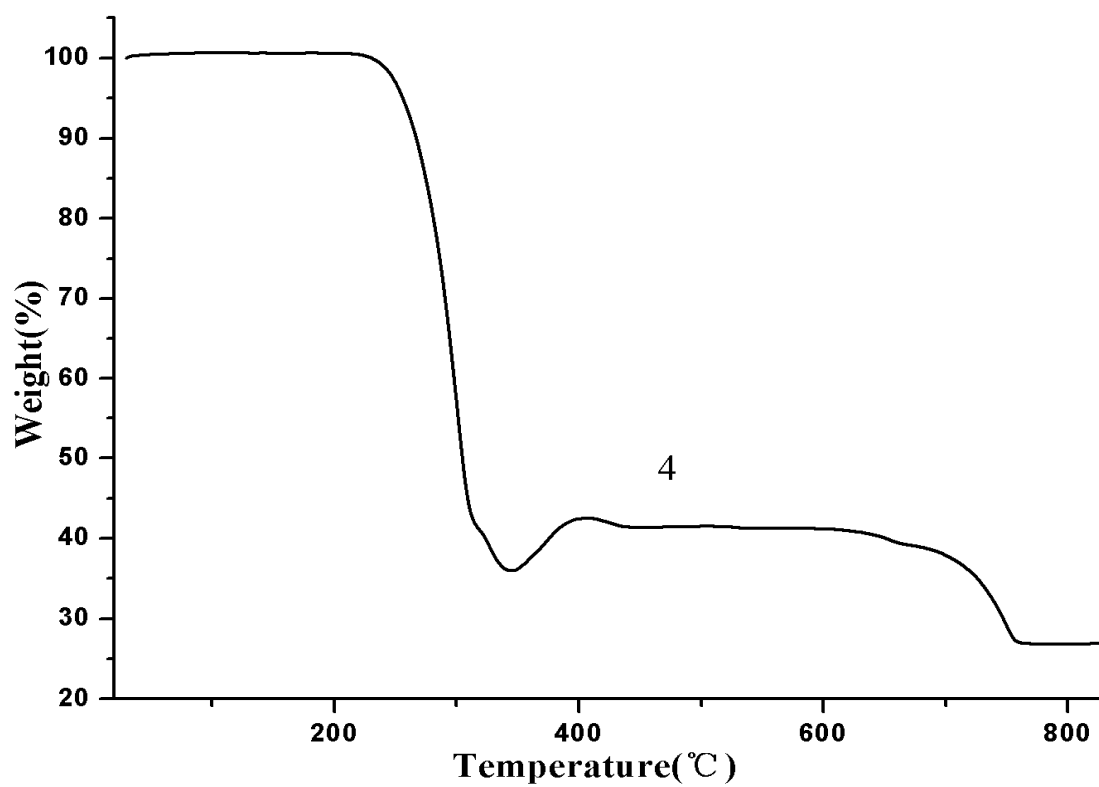

Fig. S8 TGA curves of 4
